# Supplementary material for: Combining Mutations That Inhibit Two Distinct Steps of the ATP Hydrolysis Cycle Restores Wild-Type Function in the Lipopolysaccharide Transporter and Shows that ATP Binding Triggers Transport
Source: mBio. 2019 Aug 20;10(4):e01931-19. doi: 10.1128/mBio.01931-19 (PMC6703430; doi:10.1128/mBio.01931-19)
Supplement: FIG S7 [file mBio.01931-19-sf007.pdf]

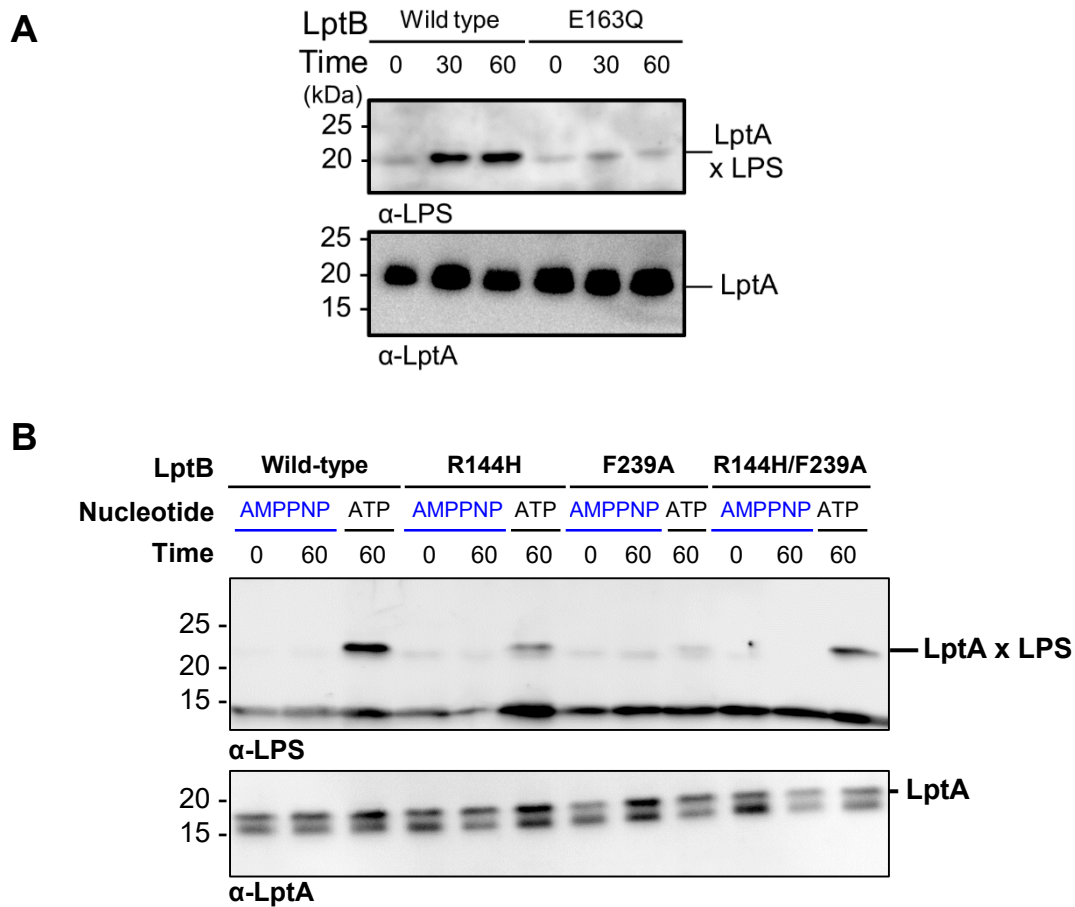

**Figure S7: ATP hydrolysis is required for LPS release from proteoliposomes.** **(A)** Complexes containing the catalytically dead LptB<sup>E163Q</sup> variant are defective in extracting LPS from liposomes. Assay monitoring LPS release from liposomes containing LptB<sub>2</sub>FGC complexes with LptB<sup>WT</sup> and catalytically dead LptB<sup>E163Q</sup> variants. Released LPS was UV-crosslinked to LptA<sup>I36pBpa</sup> and the resulting LptA<sup>I36pBpa</sup> x LPS adducts were detected by LPS immunoblot (top panel). Assays were initiated by the addition of ATP and incubated at 30°C for the indicated amount of time prior to crosslinking. LptA immunoblots are shown to confirm total LptA levels (bottom panel). Data are representative of three independent biological replicates. **(B)** *In vitro* assays for release of LPS from proteoliposomes containing LptB<sub>2</sub>CFG complexes with different LptB variants were performed in the presence of either ATP or non-hydrolysable AMPPNP. After 60 min, LPS was cross-linked to LptA<sup>I36pBpa</sup> and the resulting LPS-LptA<sup>I36pBpa</sup> adducts (marked LptA x LPS) were detected by LPS immunoblot (top panel). Total levels of LptA<sup>I36pBpa</sup> in the assay were confirmed by LptA immunoblotting (bottom panel). We also did not detect LPS transport by complexes containing LptB<sup>WT</sup> or LptB<sup>R144H/F239A</sup> when using the non-hydrolysable ATP analogs α,β-methylene ATP (ApCpp), 2-chloroadenosine β, γ-methylene ATP (AppCp), ATP-γS, and AppNH<sub>2</sub>.
