# Supplementary material for: Combining Mutations That Inhibit Two Distinct Steps of the ATP Hydrolysis Cycle Restores Wild-Type Function in the Lipopolysaccharide Transporter and Shows that ATP Binding Triggers Transport
Source: PubMed Central journal article supplement (PMC6703430; doi:10.1128/mbio.01931-19), 2019-08-20
Supplement: mBio.01931-19-s0001.pdf [file mBio.01931-19-s0001.pdf]

**Combining mutations that inhibit two distinct steps of the ATP hydrolysis cycle restores wild-type function in the lipopolysaccharide transporter and shows that ATP binding triggers transport**

Brent W. Simpson, Karanbir S. Pahil, Tristan W. Owens, Emily A. Lundstedt, Rebecca M. Davis, Daniel Kahne, and Natividad Ruiz

**SUPPLEMENTAL REFERENCES FOR FIG. S2 AND DATASET 1.**

1. Finn RD, Tate J, Mistry J, Coggill PC, Sammut SJ, Hotz HR, Ceric G, Forslund K, Eddy SR, Sonnhammer EL, Bateman A. 2008. The Pfam protein families database. *Nucleic Acids Res* 36:D281-8.
2. Waterhouse AM, Procter JB, Martin DM, Clamp M, Barton GJ. 2009. Jalview Version 2-- a multiple sequence alignment editor and analysis workbench. *Bioinformatics* 25:1189-91.
3. Casadaban MJ. 1976. Transposition and fusion of the lac genes to selected promoters in *Escherichia coli* using bacteriophage lambda and Mu. *J Mol Biol* 104:541-55.
4. Ruiz N, Wu T, Kahne D, Silhavy TJ. 2006. Probing the barrier function of the outer membrane with chemical conditionality. *ACS Chem Biol* 1:385-95.
5. May JM, Owens TW, Mandler MD, Simpson BW, Lazarus MB, Sherman DJ, Davis RM, Okuda S, Masefski W, Ruiz N, Kahne D. 2017. The antibiotic novobiocin binds and activates the ATPase that powers lipopolysaccharide transport. *J Am Chem Soc* 139:17221-17224.
6. Sherman DJ, Lazarus MB, Murphy L, Liu C, Walker S, Ruiz N, Kahne D. 2014. Decoupling catalytic activity from biological function of the ATPase that powers lipopolysaccharide transport. *Proc Natl Acad Sci U S A* 111:4982-7.
