# Supplementary material for: Combining Mutations That Inhibit Two Distinct Steps of the ATP Hydrolysis Cycle Restores Wild-Type Function in the Lipopolysaccharide Transporter and Shows that ATP Binding Triggers Transport
Source: PubMed Central journal article supplement (PMC6703430; doi:10.1128/mbio.01931-19), 2019-08-20
Supplement: mBio.01931-19-sd001.pdf [file mBio.01931-19-sd001.pdf]

## **DATASET 1**

**Combining mutations that inhibit two distinct steps of the ATP hydrolysis cycle restores wild-type function in the lipopolysaccharide transporter and shows that ATP binding triggers transport**

Brent W. Simpson, Karanbir S. Pahil, Tristan W. Owens, Emily A. Lundstedt, Rebecca M. Davis, Daniel Kahne, and Natividad Ruiz

**Loss-of-function substitutions at the CTD of LptB confer dominant-negative phenotypes.**

| <i>lptB</i> alleles<br>(chromosomal/plasmid)        | Altered domain | Zone of inhibition <sup>a</sup> |            |              |          |
|-----------------------------------------------------|----------------|---------------------------------|------------|--------------|----------|
|                                                     |                | Bacitracin                      | Novobiocin | Erythromycin | Rifampin |
| <i>lptB</i> <sup>+</sup> (haploid)                  | None           | (10)                            | (10)       | (13)         | 9 (10)   |
| <i>lptB</i> <sup>+</sup> / <i>lptB</i> <sup>+</sup> | None           | (8)                             | (10)       | (14)         | 10       |
| <i>lptB</i> <sup>+</sup> / <i>lptB</i> (E163Q)      | Walker B       | (10)                            | 8 (9)      | 11 (15)      | 13       |
| <i>lptB</i> <sup>+</sup> / <i>lptB</i> (Y234A)      | CTD helix      | 12 (15)                         | 14         | 14           | 20       |
| <i>lptB</i> <sup>+</sup> / <i>lptB</i> (L235A)      | CTD helix      | 14 (16)                         | 15         | 15           | 21       |
| <i>lptB</i> <sup>+</sup> / <i>lptB</i> (G236A)      | CTD loop       | 10                              | 13         | 11 (15)      | 17       |
| <i>lptB</i> <sup>+</sup> / <i>lptB</i> (F239A)      | CTD loop       | 11                              | 16         | 11 (15)      | 16       |

<sup>a</sup>OM permeability of merodiploid strains carrying native chromosomal *lptB* and various *lptB* alleles in pET23/42 was assessed by disc diffusion assays in LB. Numbers indicate diameter (in mm) of the zone of total growth inhibition or that of partial growth (in parenthesis). Data are representative of at least three independent experiments.

**OM-permeability defects of haploid strains with mutations in *lptB* that disrupt the interaction between the switch helix and CTD loop.**

| <i>lptB</i> allele             | Zone of inhibition <sup>a</sup> |            |              |          |
|--------------------------------|---------------------------------|------------|--------------|----------|
|                                | Bacitracin                      | Novobiocin | Erythromycin | Rifampin |
| <i>lptB</i> <sup>+</sup>       | (8)                             | (8)        | 8 (10)       | 9 (10)   |
| <i>lptB</i> ( $\Delta$ L241)   | 11                              | 14 (21)    | 13 (16)      | 12       |
| <i>lptB</i> -EHis <sub>8</sub> | 13                              | 14 (22)    | 16 (20)      | 13       |
| <i>lptB</i> (R198A)            | 15                              | 15 (24)    | 15 (20)      | 13       |

<sup>a</sup>OM permeability of haploid strains carrying various *lptB* alleles in pET23/42 was assessed by disc diffusion assays in LB. Numbers indicate diameter (in mm) of the zone of total growth inhibition or that of partial growth (in parenthesis). Data are representative of at least three independent experiments. Data for *lptB*<sup>+</sup>, *lptB*(L241 $\Delta$ ) and *lptB*-EHis<sub>8</sub> strains are also shown in Fig. S1C.

Genetic interactions between changes in R144, R198, and alterations to the CTD of LptB.

| Domains affected         | <i>lptB</i> allele                  | Complements $\Delta lptB$ ? <sup>a</sup> |     | Zone of inhibition <sup>b</sup> |            |              |          |
|--------------------------|-------------------------------------|------------------------------------------|-----|---------------------------------|------------|--------------|----------|
|                          |                                     | LB                                       | Min | Bacitracin                      | Novobiocin | Erythromycin | Rifampin |
| None                     | <i>lptB</i> <sup>+</sup>            | YES                                      | YES | (8)                             | (8)        | 8 (10)       | 9 (10)   |
| Sig helix                | <i>lptB(R144H)</i>                  | NO                                       | YES | N/A                             | N/A        | N/A          | N/A      |
| CT loop                  | <i>lptB-EHis<sub>8</sub></i>        | YES                                      | YES | 13                              | 14 (22)    | 16 (20)      | 13       |
| Sig helix & CT loop      | <i>lptB(R144H)-EHis<sub>8</sub></i> | YES                                      | YES | 11                              | (9)        | (16)         | 13       |
| CT loop                  | <i>lptB(F239A)</i>                  | NO                                       | NO  | N/A                             | N/A        | N/A          | N/A      |
| Sig helix & CT loop      | <i>lptB(R144H/F239A)</i>            | YES                                      | YES | (8)                             | (8)        | 8 (10)       | 11       |
| CT loop                  | <i>lptB(G236A)</i>                  | NO                                       | NO  | N/A                             | N/A        | N/A          | N/A      |
| Sig helix & CT loop      | <i>lptB(R144H/G236A)</i>            | YES                                      | YES | 16                              | (9)        | (20)         | 21       |
| CT helix                 | <i>lptB(L235A)</i>                  | NO                                       | NO  | N/A                             | N/A        | N/A          | N/A      |
| Sig helix & CT helix     | <i>lptB(R144H/L235A)</i>            | NO                                       | NO  | N/A                             | N/A        | N/A          | N/A      |
| CT helix                 | <i>lptB(Y234A)</i>                  | NO                                       | NO  | N/A                             | N/A        | N/A          | N/A      |
| Sig helix & CT helix     | <i>lptB(R144H/Y234A)</i>            | NO                                       | NO  | N/A                             | N/A        | N/A          | N/A      |
| Switch helix             | <i>lptB(R198E)</i>                  | NO                                       | NO  | N/A                             | N/A        | N/A          | N/A      |
| Sig helix & Switch helix | <i>lptB(R144H/R198E)</i>            | YES                                      | YES | 12                              | (9)        | 9 (16)       | 14       |

<sup>a</sup> Ability to complement a chromosomal  $\Delta lptB$  allele on rich (LB) and minimal (Min) media.

<sup>b</sup> Antibiotic sensitivity was assessed by disc-diffusion assay on LB plates. Numbers represent the diameter (in mm) of partial (in parenthesis) or total zone of inhibition around the disc. Data is representative of at least three independent assays. N/A, not applicable because strain does not grow in LB.

**Genetic interactions between changes in Walker A residue T45 and alterations to the CTD of LptB.**

| <i>lptB</i> allele       | Complements $\Delta$ <i>lptB</i> ? <sup>a</sup> |     | Zone of inhibition (mm) <sup>b</sup> |            |              |          |
|--------------------------|-------------------------------------------------|-----|--------------------------------------|------------|--------------|----------|
|                          | LB                                              | Min | Bacitracin                           | Novobiocin | Erythromycin | Rifampin |
| <i>lptB</i> <sup>+</sup> | YES                                             | YES | (8)                                  | (8)        | 8 (12)       | 8        |
| <i>lptB</i> (T45A)       | YES                                             | YES | (8)                                  | (8)        | 8 (12)       | 8        |
| <i>lptB</i> (F239A)      | NO                                              | NO  | N/A                                  | N/A        | N/A          | N/A      |
| <i>lptB</i> (T45A/F239A) | YES                                             | YES | 14                                   | 13 (22)    | 14 (19)      | 12 (17)  |
| <i>lptB</i> (Y234A)      | NO                                              | NO  | N/A                                  | N/A        | N/A          | N/A      |
| <i>lptB</i> (T45A/Y234A) | NO                                              | NO  | N/A                                  | N/A        | N/A          | N/A      |

<sup>a</sup> Ability to complement a chromosomal  $\Delta$ *lptB* allele on rich (LB) and minimal (Min) media.

<sup>b</sup> Antibiotic sensitivity of viable haploid strains grown in LB using a disc diffusion assay. Numbers represent the diameter (in mm) of the zone of inhibition or that of partial growth (parenthesis). N/A, not applicable because strain does not grow in LB. Data are representative of at least three independent experiments.

### Strains used in this study.

| Strain       | Genotype                                                                                                                                                                                                                  | Source            |
|--------------|---------------------------------------------------------------------------------------------------------------------------------------------------------------------------------------------------------------------------|-------------------|
| DH5 $\alpha$ | F <sup>-</sup> $\phi$ 80lacZ $\Delta$ M15 $\Delta$ (lacZYA-argF)U169 recA1 endA1 hsdR17 ( <i>r<sub>K</sub><sup>-</sup></i> , <i>m<sub>K</sub><sup>+</sup></i> ) <i>phoA supE44 <math>\lambda</math><sup>-</sup> thi-1</i> | Life Technologies |
| MC4100       | F <sup>-</sup> <i>araD139 <math>\Delta</math>(argF-lac)U169 rpsL150 relA1 flbB5301 deoC1 ptsF25 rbsR</i>                                                                                                                  | (3)               |
| NR754        | MC4100 <i>ara</i> <sup>+</sup>                                                                                                                                                                                            | (4)               |
| NR760        | NR754 <i>lptD4213</i>                                                                                                                                                                                                     | (4)               |
| NR1768       | NR754 <i>lptB1-kan</i>                                                                                                                                                                                                    | (5)               |
| NR1962       | NR754 <i>lptB1(G33C)-kan</i>                                                                                                                                                                                              | (5)               |
| NR1963       | NR754 <i>lptB1(R144H)-kan</i>                                                                                                                                                                                             | (5)               |
| NR2974       | NR754 <i>lptB1(T43S)-kan</i>                                                                                                                                                                                              | This study        |
| NR2975       | NR754 <i>lptB1(G33A)-kan</i>                                                                                                                                                                                              | This study        |
| NR2976       | NR754 <i>lptB1(I148T)-kan</i>                                                                                                                                                                                             | This study        |
| NR3025       | NR754 <i>lptB1(T45A)-kan</i>                                                                                                                                                                                              | This study        |
| NR3026       | NR754 <i>lptB1(L35Q)-kan</i>                                                                                                                                                                                              | This study        |
| NR3733       | NR754 <i>lptB1(S243Stop)-kan</i>                                                                                                                                                                                          | This study        |
| NR1872       | NR754 (pET23/42LptB-EHis8)                                                                                                                                                                                                | (6)               |
| NR2583       | NR754 (pET23/42LptB)                                                                                                                                                                                                      | (6)               |
| NR2918       | NR754 (pET23/42LptBR198A-EHis8)                                                                                                                                                                                           | This study        |
| NR3085       | NR754 (pET23/42LptBR144A)                                                                                                                                                                                                 | This study        |
| NR3086       | NR754 (pET23/42LptBR144A-EHis8)                                                                                                                                                                                           | This study        |
| NR3087       | NR754 (pET23/42LptBR144F)                                                                                                                                                                                                 | This study        |
| NR3088       | NR754 (pET23/42LptBR144F-EHis8)                                                                                                                                                                                           | This study        |
| NR3314       | NR754 (pET23/42LptBR145A-EHis8)                                                                                                                                                                                           | This study        |
| NR3486       | NR754 (pET23/42LptBY234A)                                                                                                                                                                                                 | This study        |
| NR3487       | NR754 (pET23/42LptBT45A/Y234A)                                                                                                                                                                                            | This study        |
| NR3488       | NR754 (pET23/42LptBR144H/Y234A)                                                                                                                                                                                           | This study        |
| NR4328       | NR754 (pET23/42LptBL235A)                                                                                                                                                                                                 | This study        |
| NR4329       | NR754 (pET23/42LptBL235S)                                                                                                                                                                                                 | This study        |
| NR4330       | NR754 (pET23/42LptBG236A)                                                                                                                                                                                                 | This study        |
| NR4331       | NR754 (pET23/42LptBG236S)                                                                                                                                                                                                 | This study        |
| NR4846       | NR754 (pET23/42LptBK177E)                                                                                                                                                                                                 | This study        |
| NR4861       | NR754 (pET23/42LptBR198E)                                                                                                                                                                                                 | This study        |
| NR4862       | NR754 (pET23/42LptBK177E-EHis8)                                                                                                                                                                                           | This study        |

|               |                                                                |            |
|---------------|----------------------------------------------------------------|------------|
| <b>NR4863</b> | NR754 (pET23/42LptBR198E-EHis8)                                | This study |
| <b>NR4864</b> | NR754 (pET23/42LptB-RHis8)                                     | This study |
| <b>NR5070</b> | NR754 (pET23/42LptBE199R)                                      | This study |
| <b>NR5100</b> | NR754 (pET23/42LptBE199R-EHis8)                                | This study |
| <b>NR5153</b> | NR754 (pET23/42LptBF239A)                                      | This study |
| <b>NR5235</b> | NR754 (pET23/42LptBD175A-EHis8)                                | This study |
| <b>NR2050</b> | NR754 $\Delta$ lptB::frt tet2 (pRC7KanLptB)                    | (6)        |
| <b>NR2093</b> | NR754 $\Delta$ lptB::frt tet2 (pET23/42LptB-EHis8)             | (6)        |
| <b>NR2101</b> | NR754 $\Delta$ lptB::frt tet2 (pET23/42LptB)                   | (6)        |
| <b>NR2952</b> | NR754 $\Delta$ lptB::frt tet2 (pET23/42LptBR198A)              | This study |
| <b>NR3003</b> | NR754 $\Delta$ lptB::frt tet2 (pET23/42LptBG33C)               | This study |
| <b>NR3005</b> | NR754 $\Delta$ lptB::frt tet2 (pET23/42LptBG33C-EHis8)         | This study |
| <b>NR3290</b> | NR754 $\Delta$ lptB::frt tet2 (pET23/42LptBL35Q-EHis8)         | This study |
| <b>NR3291</b> | NR754 $\Delta$ lptB::frt tet2 (pET23/42LptBT43A-EHis8)         | This study |
| <b>NR3292</b> | NR754 $\Delta$ lptB::frt tet2 (pET23/42LptBT45A-EHis8)         | This study |
| <b>NR3032</b> | NR754 $\Delta$ lptB::frt tet2 (pET23/42LptBR144H-EHis8)        | This study |
| <b>NR4511</b> | NR754 $\Delta$ lptB::frt tet2 (pET23/42LptBI148T-EHis8)        | This study |
| <b>NR3234</b> | NR754 $\Delta$ lptB::frt tet2 (pET23/42LptBR198A-EHis8)        | This study |
| <b>NR3294</b> | NR754 $\Delta$ lptB::frt tet2 (pET23/42LptBLptB $\Delta$ L241) | This study |
| <b>NR3302</b> | NR754 $\Delta$ lptB::frt tet2 (pET23/42LptBI148S-EHis8)        | This study |
| <b>NR3303</b> | NR754 $\Delta$ lptB::frt tet2 (pET23/42LptBR144Q)              | This study |
| <b>NR3304</b> | NR754 $\Delta$ lptB::frt tet2 (pET23/42LptBR144Q-EHis8)        | This study |
| <b>NR5243</b> | NR754 $\Delta$ lptB::frt tet2 (pET23/42LptBG33A)               | This study |
| <b>NR3315</b> | NR754 $\Delta$ lptB::frt tet2 (pET23/42LptBL35Q)               | This study |
| <b>NR3316</b> | NR754 $\Delta$ lptB::frt tet2 (pET23/42LptBT43S)               | This study |
| <b>NR3317</b> | NR754 $\Delta$ lptB::frt tet2 (pET23/42LptBT45A)               | This study |
| <b>NR3324</b> | NR754 $\Delta$ lptB::frt tet2 (pET23/42LptBR145A)              | This study |
| <b>NR3325</b> | NR754 $\Delta$ lptB::frt tet2 (pET23/42LptBI148S)              | This study |
| <b>NR3533</b> | NR754 $\Delta$ lptB::frt tet2 (pET23/42LptBT45A/F239A)         | This study |
| <b>NR3534</b> | NR754 $\Delta$ lptB::frt tet2 (pET23/42LptBR144H/F239A)        | This study |
| <b>NR3657</b> | NR754 $\Delta$ lptB::frt tet2 (pET23/42LptBS172A)              | This study |
| <b>NR3658</b> | NR754 $\Delta$ lptB::frt tet2 (pET23/42LptBS172A-EHis8)        | This study |
| <b>NR4226</b> | NR754 $\Delta$ lptB::frt tet2 (pET23/42LptBY234F)              | This study |
| <b>NR4227</b> | NR754 $\Delta$ lptB::frt tet2 (pET23/42LptBF239Y)              | This study |

|               |                                                                                    |            |
|---------------|------------------------------------------------------------------------------------|------------|
| <b>NR4345</b> | NR754 $\Delta$ <i>lptB::frit tet2</i> (pRC7KanLptB, pET23/42LptBR144H/L235A)       | This study |
| <b>NR4388</b> | NR754 $\Delta$ <i>lptB::frit tet2</i> (pET23/42LptBR144H/G236A)                    | This study |
| <b>NR3174</b> | NR754 $\Delta$ <i>lptB::frit tet2</i> (pET23/42LptBR144H)                          | This study |
| <b>NR4512</b> | NR754 $\Delta$ <i>lptB::frit tet2</i> (pET23/42LptBI148V-EHis8)                    | This study |
| <b>NR4532</b> | NR754 $\Delta$ <i>lptB::frit tet2</i> (pET23/42LptBI148T)                          | This study |
| <b>NR4533</b> | NR754 $\Delta$ <i>lptB::frit tet2</i> (pET23/42LptBV230S)                          | This study |
| <b>NR4534</b> | NR754 $\Delta$ <i>lptB::frit tet2</i> (pET23/42LptBK231A)                          | This study |
| <b>NR4535</b> | NR754 $\Delta$ <i>lptB::frit tet2</i> (pET23/42LptBR232A)                          | This study |
| <b>NR4537</b> | NR754 $\Delta$ <i>lptB::frit tet2</i> (pET23/42LptBV233T)                          | This study |
| <b>NR4844</b> | NR754 $\Delta$ <i>lptB::frit tet2</i> (pET23/42LptBI148V)                          | This study |
| <b>NR4847</b> | NR754 $\Delta$ <i>lptB::frit tet2</i> (pET23/42LptBR240E)                          | This study |
| <b>NR4848</b> | NR754 $\Delta$ <i>lptB::frit tet2</i> (pET23/42LptB-R)                             | This study |
| <b>NR4849</b> | NR754 $\Delta$ <i>lptB::frit tet2</i> (pET23/42LptBI176T-EHis8)                    | This study |
| <b>NR4908</b> | NR754 $\Delta$ <i>lptB::frit tet2</i> (pET23/42LptBK177A)                          | This study |
| <b>NR4912</b> | NR754 $\Delta$ <i>lptB::frit tet2</i> (pET23/42LptBK177A-EHis8)                    | This study |
| <b>NR4913</b> | NR754 $\Delta$ <i>lptB::frit tet2</i> (pET23/42LptBE199A)                          | This study |
| <b>NR4914</b> | NR754 $\Delta$ <i>lptB::frit tet2</i> (pET23/42LptBR144H/R198)                     | This study |
| <b>NR4915</b> | NR754 $\Delta$ <i>lptB::frit tet2</i> (pET23/42LptBE199A-EHis8)                    | This study |
| <b>NR4916</b> | NR754 $\Delta$ <i>lptB::frit tet2</i> (pET23/42LptBE237A)                          | This study |
| <b>NR4918</b> | NR754 $\Delta$ <i>lptB::frit tet2</i> (pET23/42LptBD238A)                          | This study |
| <b>NR5059</b> | NR754 $\Delta$ <i>lptB::frit tet2</i> (pET23/42LptBI176T)                          | This study |
| <b>NR5233</b> | NR754 $\Delta$ <i>lptB::frit tet2</i> (pET23/42LptBD175A)                          | This study |
| <b>NR5110</b> | NR754 $\Delta$ <i>lptB::frit tet2</i> (pRC7KanLptB, pET23/42LptBR144H/E163Q)       | This study |
| <b>NR5969</b> | NR754 $\Delta$ <i>lptB::frit tet2</i> (pRC7KanLptB, pET23/42LptBR144H/E163Q/F239A) | This study |
| <b>NR5112</b> | NR754 $\Delta$ <i>lptB::frit tet2</i> (pRC7KanLptB, pET23/42LptBE163Q/F239A)       | This study |
| <b>NR2723</b> | NR754 (pET23/42LptBE163Q)                                                          | (6)        |



**Primers used in this study.**

| <b>Primer name</b>   | <b>Change</b> | <b>Primer sequence 5' to 3'</b>                |
|----------------------|---------------|------------------------------------------------|
| T7 seq               | N/A           | TAA TAC GAC TCA CTA TAG                        |
| 5LptB77up            | N/A           | GTT CTG GTG CCG TCG CAG                        |
| 3LptB50down          | N/A           | CAT GTT CAG AAT CGT ACT CTC CTG C              |
| LptBG33Asense        | G33A          | GGG GAA ATT GTC GCT CTG CTG GGG C              |
| LptBG33Aanti         | G33A          | GCC CCA GCA GAG CGA CAA TTT CCC C              |
| 5LptBG33C            | G33C          | CGG GGA AAT TGT CTG TCT GCT GGG G              |
| 3LptBG33C            | G33C          | CCC CAG CAG ACA GAC AAT TTC CCC G              |
| LptB_L35Q            | L35Q          | CAC CGT TTG GCC CCT GCA GAC CGA C              |
| LptB_L35Q_antisense  | L35Q          | GTC GGT CTG CAG GGG CCA AAC GGT G              |
| LptB_T43S            | T43S          | CAT GTA GAA AGT GGT GCT CTT ACC<br>GGC ACC G   |
| LptB_T43S_antisense  | T43S          | CGG TGC CGG TAA GAG CAC CAC TTT<br>CTA CAT G   |
| LptB_T45A            | T45A          | GTG CCG GTA AGA CCA CCG CTT TCT<br>ACA TGG TTG |
| LptB_T45A_antisense  | T45A          | CAA CCA TGT AGA AAG CGG TGG TCT<br>TAC CGG CAC |
| lptB R144A sense     | R144A         | GGG GTG AAC GTG CCC GTG TAG AAA T              |
| lptB R144A anti      | R144A         | ATT TCT ACA CGG GCA CGT TCA CCC C              |
| lptB R144F sense     | R144F         | CTC CGG GGG TGA ACG TTT CCG TGT<br>AGA A       |
| lptB R144F anti      | R144F         | TTC TAC ACG GAA ACG TTC ACC CCC<br>GGA G       |
| 5LptBR144H           | R144H         | GGG TGA ACG TCA CCG TGT AGA AAT TG             |
| 3LptBR144H           | R144H         | CAA TTT CTA CAC GGT GAC GTT CAC CC             |
| lptBR144Q sense      | R144Q         | GGG GGT GAA CGT CAA CGT GTA GAA<br>ATT GCC     |
| lptBR144Q anti       | R144Q         | GGC AAT TTC TAC ACG TTG ACG TTC ACC<br>CCC     |
| LptB_R145A           | R145A         | GGT GAA CGT CGC GCT GTA GAA ATT<br>GCC CG      |
| LptB_R145A_antisense | R145A         | CGG GCA ATT TCT ACA GCG CGA CGT<br>TCA CC      |
| LptB_I148S           | I148S         | GTC GCC GTG TAG AAA GTG CCC GCG C              |
| LptB_I148S_antisense | I148S         | GCG CGG GCA CTT TCT ACA CGG CGA C              |
| LptBI148Tsense       | I148T         | GTC GCC GTG TAG AAA CTG CCC GCG<br>CAC TGG     |

|                         |       |                                                  |
|-------------------------|-------|--------------------------------------------------|
| <b>LptBI148Tanti</b>    | I148T | CCA GTG CGC GGG CAG TTT CTA CAC<br>GGC GAC       |
| <b>LptBI148Vsense</b>   | I148V | GTC GCC GTG TAG AAG TTG CCC GCG<br>CAC TGG       |
| <b>LptBI148Vanti</b>    | I148V | CCA GTG CGC GGG CAA CTT CTA CAC<br>GGC GAC       |
| <b>LptBS172Asense</b>   | S172A | GGG TTG ACC CGA TCG CAG TTA TCG<br>ACA TTA AAC   |
| <b>LptBS172Aanti</b>    | S172A | GTT TAA TGT CGA TAA CTG CGA TCG<br>GGT CAA CCC   |
| <b>LptBD175Asense</b>   | D175A | CCG ATC TCG GTT ATC GCC ATT AAA<br>CGC ATC       |
| <b>LptBD175Aanti</b>    | D175A | GAT GCG TTT AAT GGC GAT AAC CGA<br>GAT CGG       |
| <b>LptB I176T Sense</b> | I176T | CTC GGT TAT CGA CAC TAA ACG CAT C                |
| <b>LptB I176T Anti</b>  | I176T | GAT GCG TTT AGT GTC GAT AAC CGA G                |
| <b>LptBK177Asense</b>   | K177A | CGG TTA TCG ACA TTG CAC GCA TCA<br>TTG AGC       |
| <b>LptBK177Aanti</b>    | K177A | GCT CAA TGA TGC GTG CAA TGT CGA<br>TAA CCG       |
| <b>LptBK177Esense</b>   | K177E | CGG TTA TCG ACA TTG AAC GCA TCA TTG<br>AGC       |
| <b>LptBK177Eanti</b>    | K177E | GCT CAA TGA TGC GTT CAA TGT CGA TAA<br>CCG       |
| <b>5LptBR198A</b>       | R198A | CTG ACC ACA ACG TGG CGG AAA CAC<br>TGG CG        |
| <b>3LptBR198A</b>       | R198A | CGC CAG TGT TTC CGC CAC GTT GTG<br>GTC AG        |
| <b>LptBR198Esense</b>   | R198E | CTG ACC ACA ACG TGG AGG AAA CAC<br>TGG CGG       |
| <b>LptBR198Eanti</b>    | R198E | CCG CCA GTG TTT CCT CCA CGT TGT<br>GGT CAG       |
| <b>LptBE199Asense</b>   | E199A | CCA CAA CGT GCG TGC TAC ACT GGC GG               |
| <b>LptBE199Aanti</b>    | E199A | CCG CCA GTG TAG CAC GCA CGT TGT GG               |
| <b>LptBE199Rsense</b>   | E199R | CCA CAA CGT GCG TCG TAC ACT GGC GG               |
| <b>LptBE199Ranti</b>    | E199R | CCG CCA GTG TAC GAC GCA CGT TGT GG               |
| <b>LptBV230Ssense</b>   | V230S | CAA GAC GAA CAC AGC AAG CGT GTA<br>TAC CTT GGG G |
| <b>LptBV230Santi</b>    | V230S | CCC CAA GGT ATA CAC GCT TGC TGT<br>GTT CGT CTT G |
| <b>LptBK231Asense</b>   | K231A | CAA GAC GAA CAC GTT GCC CGT GTA<br>TAC CTT GGG   |
| <b>LptBK231Aanti</b>    | K231A | CCC AAG GTA TAC ACG GGC AAC GTG<br>TTC GTC TTG   |

|                             |       |                                                                |
|-----------------------------|-------|----------------------------------------------------------------|
| <b>LptBR232Asense</b>       | R232A | GAC GAA CAC GTT AAG GCT GTA TAC<br>CTT GGG G                   |
| <b>LptBR232Aanti</b>        | R232A | CCC CAA GGT ATA CAG CCT TAA CGT<br>GTT CGT C                   |
| <b>LptBV233T</b>            | V233T | CAA GAC GAA CAC GTT AAG CGT ACC<br>TAC CTT GGG GAA GAC TTC AGA |
| <b>LptBV233T_antisense</b>  | V233T | TCT GAA GTC TTC CCC AAG GTA GGT<br>ACG CTT AAC GTG TTC GTC TTG |
| <b>5LptB77up</b>            | N/A   | GTT CTG GTG CCG TCG CAG                                        |
| <b>3LptB50down</b>          | N/A   | CAT GTT CAG AAT CGT ACT CTC CTG C                              |
| <b>LptBG33Asense</b>        | G33A  | GGG GAA ATT GTC GCT CTG CTG GGG C                              |
| <b>LptBG33Aanti</b>         | G33A  | GCC CCA GCA GAG CGA CAA TTT CCC C                              |
| <b>5LptBG33C</b>            | G33C  | CGG GGA AAT TGT CTG TCT GCT GGG G                              |
| <b>3LptBG33C</b>            | G33C  | CCC CAG CAG ACA GAC AAT TTC CCC G                              |
| <b>LptB_L35Q</b>            | L35Q  | CAC CGT TTG GCC CCT GCA GAC CGA C                              |
| <b>LptB_L35Q_antisense</b>  | L35Q  | GTC GGT CTG CAG GGG CCA AAC GGT G                              |
| <b>LptB_T43S</b>            | T43S  | CAT GTA GAA AGT GGT GCT CTT ACC<br>GGC ACC G                   |
| <b>LptB_T43S_antisense</b>  | T43S  | CGG TGC CGG TAA GAG CAC CAC TTT<br>CTA CAT G                   |
| <b>LptB_T45A</b>            | T45A  | GTG CCG GTA AGA CCA CCG CTT TCT<br>ACA TGG TTG                 |
| <b>LptB_T45A_antisense</b>  | T45A  | CAA CCA TGT AGA AAG CGG TGG TCT<br>TAC CGG CAC                 |
| <b>lptB R144A sense</b>     | R144A | GGG GTG AAC GTG CCC GTG TAG AAA T                              |
| <b>lptB R144A anti</b>      | R144A | ATT TCT ACA CGG GCA CGT TCA CCC C                              |
| <b>lptB R144F sense</b>     | R144F | CTC CGG GGG TGA ACG TTT CCG TGT<br>AGA A                       |
| <b>lptB R144F anti</b>      | R144F | TTC TAC ACG GAA ACG TTC ACC CCC<br>GGA G                       |
| <b>5LptBR144H</b>           | R144H | GGG TGA ACG TCA CCG TGT AGA AAT TG                             |
| <b>3LptBR144H</b>           | R144H | CAA TTT CTA CAC GGT GAC GTT CAC CC                             |
| <b>lptBR144Q sense</b>      | R144Q | GGG GGT GAA CGT CAA CGT GTA GAA<br>ATT GCC                     |
| <b>lptBR144Q anti</b>       | R144Q | GGC AAT TTC TAC ACG TTG ACG TTC ACC<br>CCC                     |
| <b>LptB_R145A</b>           | R145A | GGT GAA CGT CGC GCT GTA GAA ATT<br>GCC CG                      |
| <b>LptB_R145A_antisense</b> | R145A | CGG GCA ATT TCT ACA GCG CGA CGT<br>TCA CC                      |
| <b>LptB_I148S</b>           | I148S | GTC GCC GTG TAG AAA GTG CCC GCG C                              |

|                             |       |                                                  |
|-----------------------------|-------|--------------------------------------------------|
| <b>LptB_I148S_antisense</b> | I148S | GCG CGG GCA CTT TCT ACA CGG CGA C                |
| <b>LptBI148Tsense</b>       | I148T | GTC GCC GTG TAG AAA CTG CCC GCG<br>CAC TGG       |
| <b>LptBI148Tanti</b>        | I148T | CCA GTG CGC GGG CAG TTT CTA CAC<br>GGC GAC       |
| <b>LptBI148Vsense</b>       | I148V | GTC GCC GTG TAG AAG TTG CCC GCG<br>CAC TGG       |
| <b>LptBI148Vanti</b>        | I148V | CCA GTG CGC GGG CAA CTT CTA CAC<br>GGC GAC       |
| <b>LptBS172Asense</b>       | S172A | GGG TTG ACC CGA TCG CAG TTA TCG<br>ACA TTA AAC   |
| <b>LptBS172Aanti</b>        | S172A | GTT TAA TGT CGA TAA CTG CGA TCG<br>GGT CAA CCC   |
| <b>LptBD175Asense</b>       | D175A | CCG ATC TCG GTT ATC GCC ATT AAA<br>CGC ATC       |
| <b>LptBD175Aanti</b>        | D175A | GAT GCG TTT AAT GGC GAT AAC CGA<br>GAT CGG       |
| <b>LptB I176T Sense</b>     | I176T | CTC GGT TAT CGA CAC TAA ACG CAT C                |
| <b>LptB I176T Anti</b>      | I176T | GAT GCG TTT AGT GTC GAT AAC CGA G                |
| <b>LptBK177Asense</b>       | K177A | CGG TTA TCG ACA TTG CAC GCA TCA<br>TTG AGC       |
| <b>LptBK177Aanti</b>        | K177A | GCT CAA TGA TGC GTG CAA TGT CGA<br>TAA CCG       |
| <b>LptBK177Esense</b>       | K177E | CGG TTA TCG ACA TTG AAC GCA TCA TTG<br>AGC       |
| <b>LptBK177Eanti</b>        | K177E | GCT CAA TGA TGC GTT CAA TGT CGA TAA<br>CCG       |
| <b>5LptBR198A</b>           | R198A | CTG ACC ACA ACG TGG CGG AAA CAC<br>TGG CG        |
| <b>3LptBR198A</b>           | R198A | CGC CAG TGT TTC CGC CAC GTT GTG<br>GTC AG        |
| <b>LptBR198Esense</b>       | R198E | CTG ACC ACA ACG TGG AGG AAA CAC<br>TGG CGG       |
| <b>LptBR198Eanti</b>        | R198E | CCG CCA GTG TTT CCT CCA CGT TGT<br>GGT CAG       |
| <b>LptBE199Asense</b>       | E199A | CCA CAA CGT GCG TGC TAC ACT GGC GG               |
| <b>LptBE199Aanti</b>        | E199A | CCG CCA GTG TAG CAC GCA CGT TGT GG               |
| <b>LptBE199Rsense</b>       | E199R | CCA CAA CGT GCG TCG TAC ACT GGC GG               |
| <b>LptBE199Ranti</b>        | E199R | CCG CCA GTG TAC GAC GCA CGT TGT GG               |
| <b>LptBV230Ssense</b>       | V230S | CAA GAC GAA CAC AGC AAG CGT GTA<br>TAC CTT GGG G |
| <b>LptBV230Santi</b>        | V230S | CCC CAA GGT ATA CAC GCT TGC TGT<br>GTT CGT CTT G |

|                            |       |                                                                |
|----------------------------|-------|----------------------------------------------------------------|
| <b>LptBK231Asense</b>      | K231A | CAA GAC GAA CAC GTT GCC CGT GTA<br>TAC CTT GGG                 |
| <b>LptBK231Aanti</b>       | K231A | CCC AAG GTA TAC ACG GGC AAC GTG<br>TTC GTC TTG                 |
| <b>LptBR232Asense</b>      | R232A | GAC GAA CAC GTT AAG GCT GTA TAC<br>CTT GGG G                   |
| <b>LptBR232Aanti</b>       | R232A | CCC CAA GGT ATA CAG CCT TAA CGT<br>GTT CGT C                   |
| <b>LptBV233T</b>           | V233T | CAA GAC GAA CAC GTT AAG CGT ACC<br>TAC CTT GGG GAA GAC TTC AGA |
| <b>LptBV233T_antisense</b> | V233T | TCT GAA GTC TTC CCC AAG GTA GGT<br>ACG CTT AAC GTG TTC GTC TTG |
| <b>LptBY234A_antisense</b> | Y234A | TGA AGT CTT CCC CAA GGG CTA CAC<br>GCT TAA CGT GTT CGT C       |
| <b>LptBY234Fsense</b>      | Y234F | CACGTTAAGCGTGTATTCTTGGGGAAGA<br>CTTC                           |
| <b>LptBY234Fanti</b>       | Y234F | GAA GTC TTC CCC AAG GAA TAC ACG<br>CTT AAC GTG                 |
| <b>LptBL235Asense</b>      | L235A | GTT AAG CGT GTA TAC GCA GGG GAA<br>GAC TTC AG                  |
| <b>LptBL235Aanti</b>       | L235A | CTG AAG TCT TCC CCT GCG TAT ACA<br>CGC TTA AC                  |
| <b>LptBL235Ssense</b>      | L235S | GTT AAG CGT GTA TAC AGT GGG GAA<br>GAC TTC AG                  |
| <b>LptBL235Santi</b>       | L235S | CTG AAG TCT TCC CCA CTG TAT ACA<br>CGC TTA AC                  |
| <b>LptBG236Asense</b>      | G236A | GCG TGT ATA CCT TGC AGA AGA CTT<br>CAG ACT C                   |
| <b>LptBG236Aanti</b>       | G236A | GAG TCT GAA GTC TTC TGC AAG GTA<br>TAC ACG C                   |
| <b>LptBG236Ssense</b>      | G236S | GCG TGT ATA CCT TAG CGA AGA CTT<br>CAG ACT C                   |
| <b>LptBG236Santi</b>       | G236S | GAG TCT GAA GTC TTC GCT AAG GTA<br>TAC ACG C                   |
| <b>LptBE237A</b>           | E237A | GCG TGT ATA CCT TGG GGC GGA CTT<br>CAG ACT CTG ACC             |
| <b>LptBE237A_antisense</b> | E237A | GGT CAG AGT CTG AAG TCC GCC CCA<br>AGG TAT ACA CGC             |
| <b>5LptBD238A</b>          | D238A | GTG TAT ACC TTG GGG AAG CGT TCA<br>GAC TCT GAC CTA GG          |
| <b>3LptBD238A</b>          | D238A | CCT AGG TCA GAG TCT GAA CGC TTC<br>CCC AAG GTA TAC AC          |
| <b>LptBF239A</b>           | F239A | CTT GGG GAA GAC GCC AGA CTC TGA<br>GAG CAC                     |
| <b>LptBF239A_antisense</b> | F239A | GTG CTC TCA GAG TCT GGC GTC TTC<br>CCC AAG                     |

|                                |            |                                                                                     |
|--------------------------------|------------|-------------------------------------------------------------------------------------|
| <b>LptBF239Ysense</b>          | F239Y      | CCT TGG GGA AGA CTA CAG ACT CTG<br>AGA GCA C                                        |
| <b>LptBF239Yanti</b>           | F239Y      | GTG CTC TCA GAG TCT GTA GTC TTC<br>CCC AAG G                                        |
| <b>LptBR240E</b>               | R240E      | ACC TTG GGG AAG ACT TCG AAC TCT<br>GAC CTA GGC TGC                                  |
| <b>LptBR240E_antisense</b>     | R240E      | GCA GCC TAG GTC AGA GTT CGA AGT<br>CTT CCC CAA GGT                                  |
| <b>LptB_241Amber</b>           | ΔL241      | GGG AAG ACT TCA GAT AGT GAG AGC<br>ACC AC                                           |
| <b>LptB_241Amber_antisense</b> | ΔL241      | GTG GTG CTC TCA CTA TCT GAA GTC TTC<br>CC                                           |
| <b>LptB-R242sense</b>          | lptB-R     | GGA AGA CTT CAG ACT CCG TTA GCA<br>CCA CCA CCA CCA C                                |
| <b>LptB-R242anti</b>           | lptB-R     | GTG GTG GTG GTG GTG CTA ACG GAG<br>TCT GAA GTC TTC C                                |
| <b>LptBR-His8sense</b>         | lptB-RHis8 | GAA GAC TTC AGA CTC CGT CAC CAC<br>CAC CAC CAC                                      |
| <b>LptBR-His8anti</b>          | lptB-RHis8 | GTG GTG GTG GTG GTG ACG GAG TCT<br>GAA GTC TTC                                      |
| <b>His8TEV-LptB-fwd</b>        | His8-LptB  | CAT CAC CAT CAC GAA AAC CTG TAC TTC<br>CAG GGC GCA AGC GCA ACA TTA ACT G            |
| <b>His8TEV-LptB-rev</b>        | His8-LptB  | GCT TGG CCC TGG AAG TAC AGG TTT<br>TCG TGA TGG TGA TGA TGA TGA TGA<br>TGA CCC ATG G |
