# Supplementary material for: Combining Mutations That Inhibit Two Distinct Steps of the ATP Hydrolysis Cycle Restores Wild-Type Function in the Lipopolysaccharide Transporter and Shows that ATP Binding Triggers Transport
Source: PubMed Central journal article supplement (PMC6703430; doi:10.1128/mbio.01931-19), 2019-08-20
Supplement: mBio.01931-19-sf004.pdf [file mBio.01931-19-sf004.pdf]

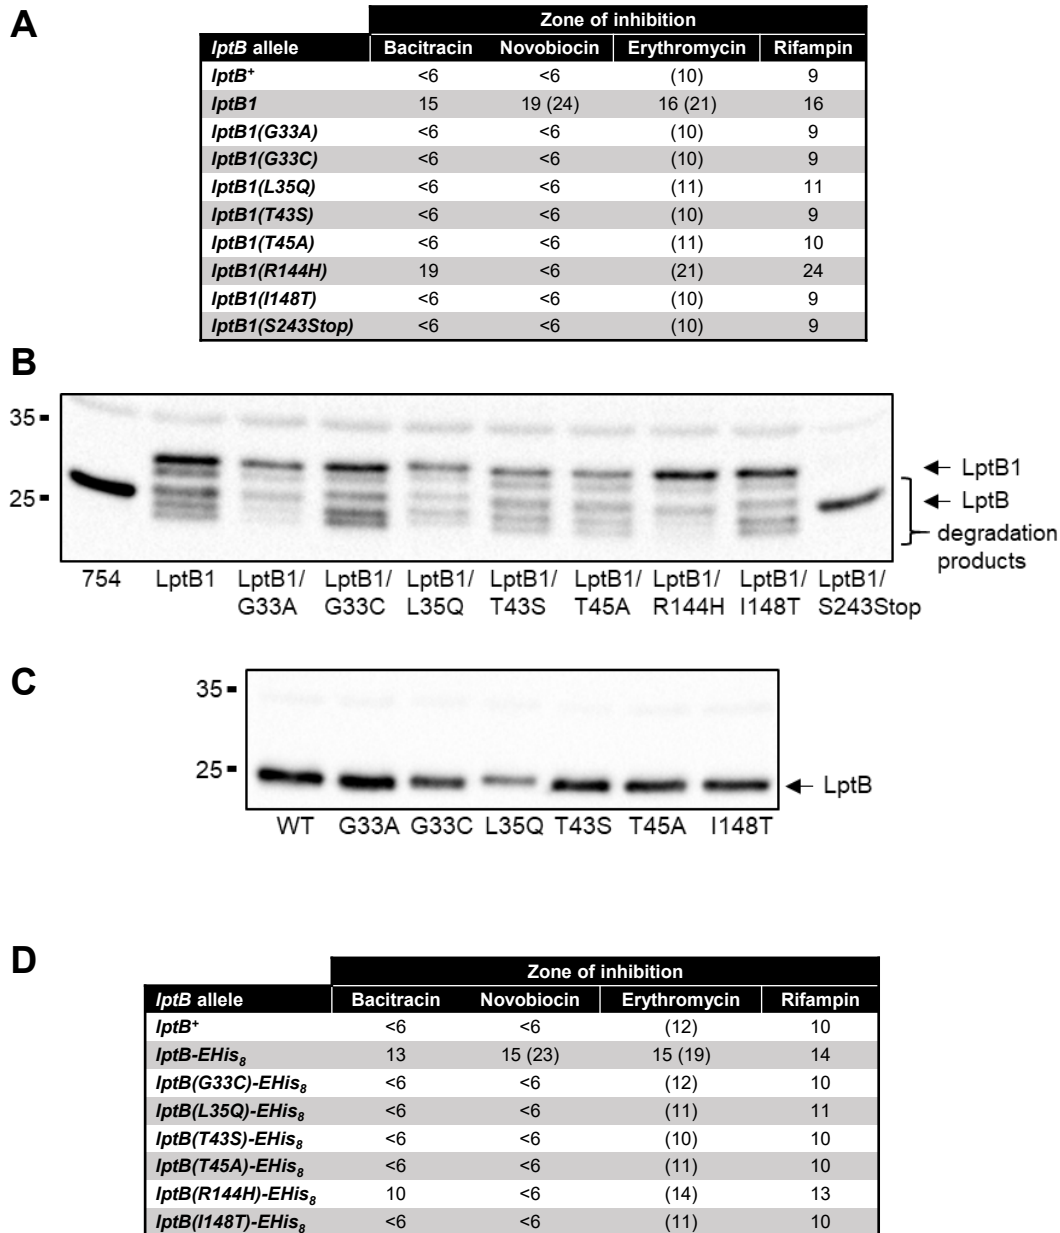

**Figure S4: Structure-function analysis of *lptB1* suppressors.** OM-permeability assay (**A**) and LptB immunoblots (**B**) of chromosomally-encoded *lptB1* and suppressors performed as described in Fig. S1 and methods. *lptB*<sup>+</sup> refers to strain NR754. (**C**) LptB immunoblot of samples from haploid strains producing LptB variants from pET23/42LptB derivatives, as described in Fig. S1. (**D**) OM-permeability assay of haploid cells carrying pET23/42LptB-EHis<sub>8</sub> derivatives with the substitutions we found as suppressors of *lptB1*. Assays were performed as described in Fig. S1. Data are representative of at least three independent experiments.
